# Supplementary material for: The effect of Salvia officinalis on blood glycemic indexes and blood lipid profile in diabetic patients: a systematic review and meta-analysis
Source: publisher site journal article supplement (doi:10.1515/jcim-2021-0425), 2022-01-25
Supplement: Supplementary file 1 [file j_jcim-2021-0425_suppl_002.docx]

**Appendix 2:** Forest plots of secondary outcomes

**
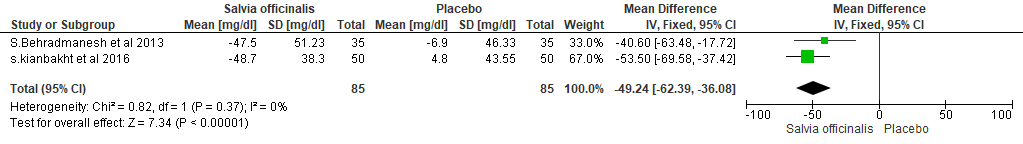
**

**Figure 1.** Effect of *Salvia Officinalis* compared to placebo on **2HPPG**


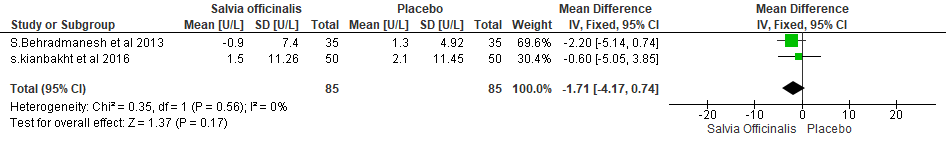


**Figure 2**. Effect of *Salvia Officinalis* compared to placebo on **AST**

**
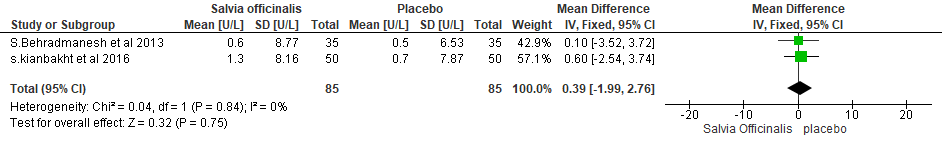
**

**Figure 3**. Effect of *Salvia Officinalis* compared to placebo on **ALT**
